# Supplementary material for: Evaluation of the Addition of Yeast Mannoprotein to Oenococcus oeni Starter Cultures to Improve Wine Malolactic Fermentation
Source: MDPI journal article supplement (doi:10.3390/fermentation10010052), 2024-01-10
Supplement: s1 [file s1]

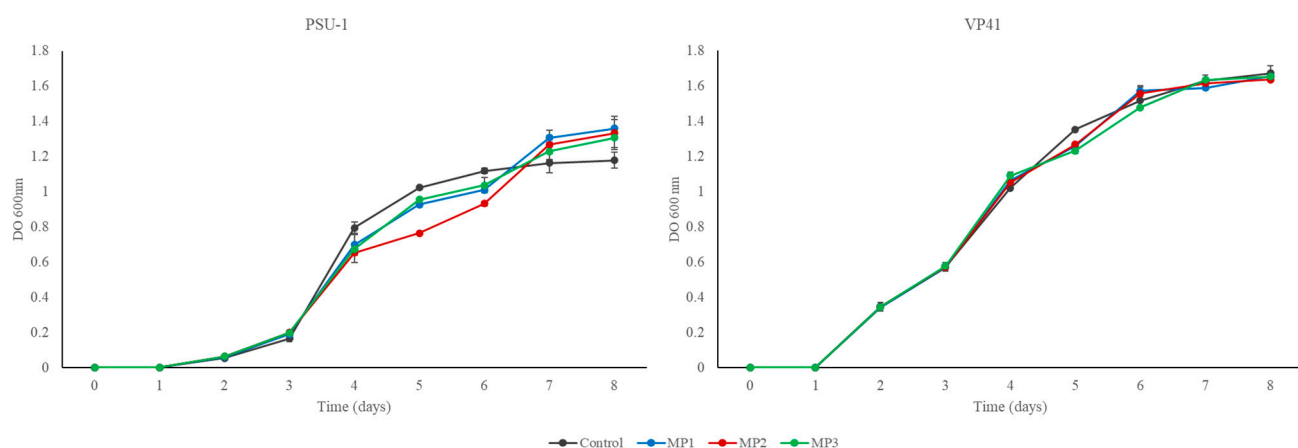

**Figure S1:** Growth curves of *O. oeni* PSU-1 and VP41 strains in MRS media by measurement of O.D. at 600 nm. The Control represents WLM fermented solely with *O. oeni* without mannoprotein enrichment, while MP1, MP2 and MP3 indicate MRS media with *O. oeni* mannoproteins enrichment with MP1, MP2 and MP3 extracts, respectively. All data are expressed as the arithmetic average  $\pm$  standard deviation of biological replicates (n = 3).

**Table S1:** Primers used for RT-qPCR analysis [24,29].

| Gene         | Primer sequence (5'-3')     |
|--------------|-----------------------------|
| <i>manA</i>  | F - TTCATTGGCGCAGCCCGTTT    |
|              | R - GCCGTTGCTAAAATCGTCCC    |
| <i>manB</i>  | F - AGTCCAGTGGGCTTCTTCT     |
|              | R - TTGGTTCCAACGATTCAAGC    |
| <i>ptsI</i>  | F - GACGAACAGCTCATGCTTCG    |
|              | R - ATCGATTAAGACCTGGCCGG    |
| <i>ptsH</i>  | F - CGATTACTGCTGACTCTGGC    |
|              | R - TACCCGCGCCAAGACTCATT    |
| <i>hsp18</i> | F - CGGTATCAGGAGTTTGTAGTTC  |
|              | R - CGTAGTAACTGCGGGAGTAATTC |
| <i>gyrB</i>  | F - GAGGATGTCCGAGAAGGATTA   |
|              | R - ACCTGCTGGGCATCTGTATTG   |
